# Supplementary material for: De novo genome assembly of the red silk cotton tree (Bombax ceiba)
Source: PubMed Central journal article supplement (PMC5967522; doi:10.1093/gigascience/giy051), 2018-05-10

|                                                      |                                                                                                                                                                                                                                                                                                                                                                                                                                                                                                                                                                                                                                                                                                                                                                                                                                                                                                                                               |                 |
|------------------------------------------------------|-----------------------------------------------------------------------------------------------------------------------------------------------------------------------------------------------------------------------------------------------------------------------------------------------------------------------------------------------------------------------------------------------------------------------------------------------------------------------------------------------------------------------------------------------------------------------------------------------------------------------------------------------------------------------------------------------------------------------------------------------------------------------------------------------------------------------------------------------------------------------------------------------------------------------------------------------|-----------------|
| <b>Manuscript Number:</b>                            | GIGA-D-18-00045R1                                                                                                                                                                                                                                                                                                                                                                                                                                                                                                                                                                                                                                                                                                                                                                                                                                                                                                                             |                 |
| <b>Full Title:</b>                                   | De novo genome assembly of the red silk cotton tree ( <i>Bombax ceiba</i> )                                                                                                                                                                                                                                                                                                                                                                                                                                                                                                                                                                                                                                                                                                                                                                                                                                                                   |                 |
| <b>Article Type:</b>                                 | Data Note                                                                                                                                                                                                                                                                                                                                                                                                                                                                                                                                                                                                                                                                                                                                                                                                                                                                                                                                     |                 |
| <b>Funding Information:</b>                          | National Natural Science Foundation of China (31460561)                                                                                                                                                                                                                                                                                                                                                                                                                                                                                                                                                                                                                                                                                                                                                                                                                                                                                       | Dr. Lizhou Tang |
|                                                      | National Natural Science Foundation of China (31760103)                                                                                                                                                                                                                                                                                                                                                                                                                                                                                                                                                                                                                                                                                                                                                                                                                                                                                       | Dr. Yong Gao    |
|                                                      | National Natural Science Foundation of China (31460179)                                                                                                                                                                                                                                                                                                                                                                                                                                                                                                                                                                                                                                                                                                                                                                                                                                                                                       | Dr. Haibo Wang  |
|                                                      | National Natural Science Foundation of China (31660680)                                                                                                                                                                                                                                                                                                                                                                                                                                                                                                                                                                                                                                                                                                                                                                                                                                                                                       | Dr. Long Yu     |
|                                                      | Applied Basic Research Key Project of Yunnan (2017FD145)                                                                                                                                                                                                                                                                                                                                                                                                                                                                                                                                                                                                                                                                                                                                                                                                                                                                                      | Dr. Yong Gao    |
| <b>Abstract:</b>                                     | <p>Background: <i>Bombax ceiba</i> L. (the red silk cotton tree) is a large deciduous tree that is distributed in tropical and sub-tropical Asia, and northern Australia. It has great economic and ecological importance, with several applications in industry and traditional medicine in many Asian countries. To facilitate the further utilization of this plant resource, we present here the draft genome sequence for <i>B. ceiba</i>.</p> <p>Findings: We assembled a relatively intact genome of <i>B. ceiba</i> by using PacBio single-molecule sequencing and BioNano optical mapping technologies. The final draft genome is approximately 895 Mb long, with contig and scaffold N50 sizes of 1.0 Mb and 2.06 Mb, respectively.</p> <p>Conclusions: The high-quality draft genome assembly of <i>B. ceiba</i> will be a valuable resource enabling further genetic improvement and more effective use of this tree species.</p> |                 |
| <b>Corresponding Author:</b>                         | Lizhou Tang<br>Center for Yunnan Plateau Biological Resources Protection and Utilization<br>Qujing, Yunnan CHINA                                                                                                                                                                                                                                                                                                                                                                                                                                                                                                                                                                                                                                                                                                                                                                                                                              |                 |
| <b>Corresponding Author Secondary Information:</b>   |                                                                                                                                                                                                                                                                                                                                                                                                                                                                                                                                                                                                                                                                                                                                                                                                                                                                                                                                               |                 |
| <b>Corresponding Author's Institution:</b>           | Center for Yunnan Plateau Biological Resources Protection and Utilization                                                                                                                                                                                                                                                                                                                                                                                                                                                                                                                                                                                                                                                                                                                                                                                                                                                                     |                 |
| <b>Corresponding Author's Secondary Institution:</b> |                                                                                                                                                                                                                                                                                                                                                                                                                                                                                                                                                                                                                                                                                                                                                                                                                                                                                                                                               |                 |
| <b>First Author:</b>                                 | Yong Gao                                                                                                                                                                                                                                                                                                                                                                                                                                                                                                                                                                                                                                                                                                                                                                                                                                                                                                                                      |                 |
| <b>First Author Secondary Information:</b>           |                                                                                                                                                                                                                                                                                                                                                                                                                                                                                                                                                                                                                                                                                                                                                                                                                                                                                                                                               |                 |
| <b>Order of Authors:</b>                             | Yong Gao                                                                                                                                                                                                                                                                                                                                                                                                                                                                                                                                                                                                                                                                                                                                                                                                                                                                                                                                      |                 |
|                                                      | Haibo Wang                                                                                                                                                                                                                                                                                                                                                                                                                                                                                                                                                                                                                                                                                                                                                                                                                                                                                                                                    |                 |
|                                                      | Chao Liu                                                                                                                                                                                                                                                                                                                                                                                                                                                                                                                                                                                                                                                                                                                                                                                                                                                                                                                                      |                 |
|                                                      | Honglong Chu                                                                                                                                                                                                                                                                                                                                                                                                                                                                                                                                                                                                                                                                                                                                                                                                                                                                                                                                  |                 |
|                                                      | Dongqin Dai                                                                                                                                                                                                                                                                                                                                                                                                                                                                                                                                                                                                                                                                                                                                                                                                                                                                                                                                   |                 |
|                                                      | Shengnan Song                                                                                                                                                                                                                                                                                                                                                                                                                                                                                                                                                                                                                                                                                                                                                                                                                                                                                                                                 |                 |
|                                                      | Long Yu                                                                                                                                                                                                                                                                                                                                                                                                                                                                                                                                                                                                                                                                                                                                                                                                                                                                                                                                       |                 |
|                                                      | Lihong Han                                                                                                                                                                                                                                                                                                                                                                                                                                                                                                                                                                                                                                                                                                                                                                                                                                                                                                                                    |                 |
|                                                      |                                                                                                                                                                                                                                                                                                                                                                                                                                                                                                                                                                                                                                                                                                                                                                                                                                                                                                                                               |                 |

|                                                |                                                                                                                                                                                                                                                                                                                                                                                                                                                                                                                                                                                                                                                                                                                                                                                                                                                                                                                                                                                                                                                                                                                                                                                                                                                                                                                                                                                                                                                                                                                                                                                                                                                                                                                                                                                                                                                                                                                                                                                                                                                                                                                                                                                                                                                                                                                                                                                                                                                                                                                                                                                                                                                                                                                                                                                                                                                                                                                                                                                                                                                                                                                                                                                                                                                                                                                                                                                                                                                                                                                                                                                                                                                                                                                                                                                                                                                                                                                                                                                                                                                                                                                                                                                                                                                                                                                                                                                         |
|------------------------------------------------|-----------------------------------------------------------------------------------------------------------------------------------------------------------------------------------------------------------------------------------------------------------------------------------------------------------------------------------------------------------------------------------------------------------------------------------------------------------------------------------------------------------------------------------------------------------------------------------------------------------------------------------------------------------------------------------------------------------------------------------------------------------------------------------------------------------------------------------------------------------------------------------------------------------------------------------------------------------------------------------------------------------------------------------------------------------------------------------------------------------------------------------------------------------------------------------------------------------------------------------------------------------------------------------------------------------------------------------------------------------------------------------------------------------------------------------------------------------------------------------------------------------------------------------------------------------------------------------------------------------------------------------------------------------------------------------------------------------------------------------------------------------------------------------------------------------------------------------------------------------------------------------------------------------------------------------------------------------------------------------------------------------------------------------------------------------------------------------------------------------------------------------------------------------------------------------------------------------------------------------------------------------------------------------------------------------------------------------------------------------------------------------------------------------------------------------------------------------------------------------------------------------------------------------------------------------------------------------------------------------------------------------------------------------------------------------------------------------------------------------------------------------------------------------------------------------------------------------------------------------------------------------------------------------------------------------------------------------------------------------------------------------------------------------------------------------------------------------------------------------------------------------------------------------------------------------------------------------------------------------------------------------------------------------------------------------------------------------------------------------------------------------------------------------------------------------------------------------------------------------------------------------------------------------------------------------------------------------------------------------------------------------------------------------------------------------------------------------------------------------------------------------------------------------------------------------------------------------------------------------------------------------------------------------------------------------------------------------------------------------------------------------------------------------------------------------------------------------------------------------------------------------------------------------------------------------------------------------------------------------------------------------------------------------------------------------------------------------------------------------------------------------------|
|                                                | Yi Fu                                                                                                                                                                                                                                                                                                                                                                                                                                                                                                                                                                                                                                                                                                                                                                                                                                                                                                                                                                                                                                                                                                                                                                                                                                                                                                                                                                                                                                                                                                                                                                                                                                                                                                                                                                                                                                                                                                                                                                                                                                                                                                                                                                                                                                                                                                                                                                                                                                                                                                                                                                                                                                                                                                                                                                                                                                                                                                                                                                                                                                                                                                                                                                                                                                                                                                                                                                                                                                                                                                                                                                                                                                                                                                                                                                                                                                                                                                                                                                                                                                                                                                                                                                                                                                                                                                                                                                                   |
|                                                | Bin Tian                                                                                                                                                                                                                                                                                                                                                                                                                                                                                                                                                                                                                                                                                                                                                                                                                                                                                                                                                                                                                                                                                                                                                                                                                                                                                                                                                                                                                                                                                                                                                                                                                                                                                                                                                                                                                                                                                                                                                                                                                                                                                                                                                                                                                                                                                                                                                                                                                                                                                                                                                                                                                                                                                                                                                                                                                                                                                                                                                                                                                                                                                                                                                                                                                                                                                                                                                                                                                                                                                                                                                                                                                                                                                                                                                                                                                                                                                                                                                                                                                                                                                                                                                                                                                                                                                                                                                                                |
|                                                | Lizhou Tang                                                                                                                                                                                                                                                                                                                                                                                                                                                                                                                                                                                                                                                                                                                                                                                                                                                                                                                                                                                                                                                                                                                                                                                                                                                                                                                                                                                                                                                                                                                                                                                                                                                                                                                                                                                                                                                                                                                                                                                                                                                                                                                                                                                                                                                                                                                                                                                                                                                                                                                                                                                                                                                                                                                                                                                                                                                                                                                                                                                                                                                                                                                                                                                                                                                                                                                                                                                                                                                                                                                                                                                                                                                                                                                                                                                                                                                                                                                                                                                                                                                                                                                                                                                                                                                                                                                                                                             |
| <b>Order of Authors Secondary Information:</b> |                                                                                                                                                                                                                                                                                                                                                                                                                                                                                                                                                                                                                                                                                                                                                                                                                                                                                                                                                                                                                                                                                                                                                                                                                                                                                                                                                                                                                                                                                                                                                                                                                                                                                                                                                                                                                                                                                                                                                                                                                                                                                                                                                                                                                                                                                                                                                                                                                                                                                                                                                                                                                                                                                                                                                                                                                                                                                                                                                                                                                                                                                                                                                                                                                                                                                                                                                                                                                                                                                                                                                                                                                                                                                                                                                                                                                                                                                                                                                                                                                                                                                                                                                                                                                                                                                                                                                                                         |
| <b>Response to Reviewers:</b>                  | <p>Dear editors and reviewers,</p> <p>The manuscript "De novo genome assembly of the red silk cotton tree (<i>Bombax ceiba</i>)" (GIGA-D-18-00045) has been carefully revised. The major revisions are marked in red, and the language has been polished by "sees-editing Ltd". We appreciate the detailed, useful comments and suggestions from you and the reviewers.</p> <p>As the editor suggested,</p> <p>1. The paper is submitted as a Data Note, and as such we do not require in-depth biological analyses. However, I do agree with reviewer 2 (their point #4), that some information on important genes and pathways will help to demonstrate the usefulness of the dataset.</p> <p>Answer: As the editor and the reviewer suggested, information on important genes and pathways will help to demonstrate the usefulness of our genome data. <i>B. ceiba</i> is an ecologically important plant which could survive in extreme climate conditions. We calculated the average Ka/Ks values and conducted a branch-site likelihood ratio test to identify positively selected genes which could contribute to the ecological adaptation of <i>B. ceiba</i>. Thirty-six genes were identified, and some annotated genes were reported to be associated with ecological adaption. Please see line 190 to 210 in the revised manuscript.</p> <p>2. Regarding minor point # 3 of reviewer 2: " L177: It may not be good to say this. Please rewrite. " I am actually not quite sure myself what the reviewer refers to here, but if I understand correctly, they feel the wording in that line 177 comes across as a bit cumbersome; this is true, but I'd prefer to have as much detail on parameters etc in the methods section as possible, and you should definitely keep that useful information.</p> <p>Answer: As the editor suggested, the information on parameters was very important. So we kept this information in the revised manuscript.</p> <p>3. Another minor remark: In the introduction, you refer to the use in Traditional Chinese Medicine: "Moreover, studies ... have validated its traditional medicinal usage." As this is still an active area of research, I feel it would be more appropriate to write "studies.... have explored its traditional medicine usage" instead of "validated".</p> <p>Answer: The suggestion has been taken seriously, and this sentence has been changed to "studies.... have explored its traditional medicine usage". Please check line 41.</p> <p>The point by point answers to the comments and suggestions of the reviewers are below.</p> <p>Reviewer: 1</p> <p>1. For every software, please (if not in the manuscript, then in the supplementary text) provide the non default parameters that were used, if any.</p> <p>Answer: The suggestion has been taken seriously, and the versions and parameters of software used in our study have been provided as one supplementary table. Please see Table S15 in the supplementary file.</p> <p>2. Line 60 precise the type (SE, PE, MP) and number of cycle of the Illumina sequencing.</p> <p>Answer: We accept the review's suggestion, and the sequencing strategy (PE) has been added. Please see line 60 in the revised manuscript.</p> <p>3. Line 106 - I would like some more details about the Illumina based scaffolding. Given that it's a small insert size library (400bp), how helpful was it to scaffold the PacBio assembly. Or do you mean the RNA-Seq data was used to scaffold? If that's the case, what parameters were used and how were multiple mapping case handled?</p> <p>Answer: The sequencing data from the Illumina DNA library (400bp) was aligned against the genome assembly. As the reviewer stated, the small insert size library had relatively limited effects on scaffolding. The analysis was aimed at filling gaps and correcting some sequencing errors of the genome assembly. Sorry for the ambiguity. The sentence has been corrected. Please see line 106 to 108.</p> <p>4. Line 111 - I would replace the title there to: Evaluation of the completeness of the genome assembly gene space. BUSCO only look at the gene space. For the completeness of the genome assembly, one would need different metrics, such as FRC (feature response curve) or any quantification of the reads that do not align to the</p> |

final assembly.

Answer: We take the review's suggestion, and the title has been changed to "Evaluation of the completeness of the genome assembly gene space".

5. Line 226 - There's a typesetting error in "financially"

Answer: We accepted the review's suggestion, and this error has been corrected in the revised manuscript.

Discretionary comments

1. Line 114 - Have you analysed the reads that do not align to the genome, what are these?

Answer: Unfortunately, we did not analyze the RNA reads which could not align to the genome assembly, and we did not know the details on these reads.

2. Line 116 - Have you checked what the 5.6% of incomplete BUSCO genes are?

Answer: There are 63 missing BUSCO genes and 19 incomplete BUSCO genes in total. We have searched these genes against the OrthoDB database to infer the gene functions.

For the 63 missing genes, there are eight genes falling in the category of pentatricopeptide repeat (PPR) superfamily protein, seven genes belonging to protein kinase domain, six genes annotated as transmembrane: Helical, five genes belonging to the tetratricopeptide repeat (TPR)-like superfamily proteins, and five genes annotated with unknown functions. The rest of genes were annotated with a variety of functions, such as peptidyl-prolyl cis-trans isomerase, WD40 repeat, regulator of chromosome condensation (RCC1) family protein, and so on.

For the 19 incomplete genes, two genes were characterized as transmembrane: Helical, and two genes were annotated with unknown functions. The other genes were annotated with a variety of functions, such as Zinc finger (C2H2), Reticulon-like protein, and so on.

3. Line 152 - The annotation could be refined using PASA. This would add splice variants to the annotation. Also, the PASA output can be post-processed to identify lncRNA. Many tools now allow for an in-depth analysis of differential transcript expression, differential transcript usage, etc. leveraging from more complete annotations.

Answer: As the reviewer suggested, PASA was a useful tool, especially for annotating splice variants. And we will try this software in our future study.

Reviewer: 2

1. Authors used a Kmer-based method to estimate the genome size. However, it seems the estimated genome size is smaller than their assembly size. Do authors know what happens here?

Answer: As the reviewer pointed, there was some inconsistency between the size of the genome survey and the genome assembly. As the heterozygosity rate of the *B. ceiba* genome was 0.88%, heterozygous regions which could not be assembled into consensus sequences might result in larger assembly. Besides, the Kmer-based method was just a preliminary estimation of the genome size. There could be some small deviation from the genome assembly.

2. For contamination checking, do authors believe a visualised GC content plot and the average GC content can tell there is no contamination in the assembly? Why didn't authors use other methods to check, such as BLASTN?

Answer: There were two strategies for deducing contaminations by GC content. 1. There were uneven GC contents in the genome. 2. The GC content was constant, but the sequencing depth varied among sequences. BLASTN was also a useful method for assessing contaminations. The suggestion of the reviewer has been taken seriously, and we randomly selected some sequences from the genome assembly and searched the data against the NCBI database of bacteria with BLASTN. No contamination from bacteria was detected. Please check line 88 to 91 in the manuscript.

3. From the report, there is a ~150Mb difference between the BioNano consensus maps and the PacBio assembly. Does that mean there are repeat collapses in the PacBio assembly or some genome regions cannot be covered by PacBio reads? How does it look like in the comparison between BioNano consensus maps and the PacBio assembly? Do they align well?

Answer: The BioNano consensus genome map recorded the order of sequence fragments and the gap size between adjacent contigs. The BioNano genome map included gaps (Ns), whereas contigs of the primary PacBio assembly did not contain any gaps. It might be the reason why there was a ~150Mb difference. And the

|                                                                               |                                                                                                                                                                                                                                                                                                                                                                                                                                                                                                                                                                                                                                                                                                                                                                                                                                                                                                                                                                                                                                                                                                                                                                                                                                                                                                                                                                                                                                                                                                                                                                                                                                                                                                                                                                                                                                                                                                                                                                                                                                                                                                                                                                                                                                                                                                                                                                                                                                                                                                                                                                                                                                                                                                                                                                                                                                                                                                                                                                                                                                                                                                                                                                                                                                                                                                                                                                                                                                                                                                                                                                                                                                                                                                                                                                                                                                                                                                                        |
|-------------------------------------------------------------------------------|------------------------------------------------------------------------------------------------------------------------------------------------------------------------------------------------------------------------------------------------------------------------------------------------------------------------------------------------------------------------------------------------------------------------------------------------------------------------------------------------------------------------------------------------------------------------------------------------------------------------------------------------------------------------------------------------------------------------------------------------------------------------------------------------------------------------------------------------------------------------------------------------------------------------------------------------------------------------------------------------------------------------------------------------------------------------------------------------------------------------------------------------------------------------------------------------------------------------------------------------------------------------------------------------------------------------------------------------------------------------------------------------------------------------------------------------------------------------------------------------------------------------------------------------------------------------------------------------------------------------------------------------------------------------------------------------------------------------------------------------------------------------------------------------------------------------------------------------------------------------------------------------------------------------------------------------------------------------------------------------------------------------------------------------------------------------------------------------------------------------------------------------------------------------------------------------------------------------------------------------------------------------------------------------------------------------------------------------------------------------------------------------------------------------------------------------------------------------------------------------------------------------------------------------------------------------------------------------------------------------------------------------------------------------------------------------------------------------------------------------------------------------------------------------------------------------------------------------------------------------------------------------------------------------------------------------------------------------------------------------------------------------------------------------------------------------------------------------------------------------------------------------------------------------------------------------------------------------------------------------------------------------------------------------------------------------------------------------------------------------------------------------------------------------------------------------------------------------------------------------------------------------------------------------------------------------------------------------------------------------------------------------------------------------------------------------------------------------------------------------------------------------------------------------------------------------------------------------------------------------------------------------------------------------|
|                                                                               | <p>inconstancy between BioNano genome map and genome assembly size was also observed in other species, such as <i>Fragaria vesca</i> [1] and <i>Tribolium castaneum</i> [2]. With the initial PacBio genome assembly as reference, approximately 54 Gb out of 160 Gb BioNano clean data could be assigned to the genome map, and the effective coverage of assembly was about 60 X.</p> <p>Reference</p> <p>1. Edger PP, VanBuren R, Colle M, et al. Single-Molecule Sequencing and Optical Mapping Yields an Improved Genome of Woodland Strawberry (<i>Fragaria Vesca</i>) with Chromosome-Scale Contiguity. <i>GigaScience</i>. 2018;7 (2):1-7. doi:10.1093/gigascience/gix124.</p> <p>2. Shelton JM, Coleman MC, Herndon N, et al. Tools and Pipelines for Bionano Data: Molecule Assembly Pipeline and Fasta Super Scaffolding Tool. <i>BMC Genomics</i>. 2015;16 (1):734.</p> <p>4. This research is more likely a technical and bioinformatics report. Some biological stories, such as important genes, their functions and roles in certain pathways, are missing. How can this research help to improve <i>Bombax ceiba</i>'s economic and ecological values?</p> <p>Answer: As the reviewer suggested, information on important genes and pathways will help to demonstrate the usefulness of our genome data. <i>B. ceiba</i> is an ecologically important plant which could survive in extreme climate conditions. So we calculated the average Ka/Ks values and conducted a branch-site likelihood ratio test to identify positively selected genes which could contribute to the ecological adaptation of <i>B. ceiba</i>. Thirty-six genes were identified, and some annotated genes were reported to be associated with ecological adaptation. Please see line 190 to 210 in the revised manuscript.</p> <p>5. The English in the manuscript needs a further edit</p> <p>Answer: We accepted the reviewer's suggestion, and the language has been polished by "sees-editing Ltd".</p> <p>Minor:</p> <p>1. It would be good to specify the version of each tool and detail the parameter settings.</p> <p>Answer: We accepted the reviewer's suggestion, and the versions and parameters of software used in our manuscript were provided as one supplementary table. Please see Table S15 in the supplementary file.</p> <p>2. It would be good to map the Illumina short reads (DNA) back to the assembly and give a mapping rate to inform the quality of the assembly.</p> <p>Answer: We accepted the reviewer's suggestion, and we have mapped the Illumina short reads (DNA) back to the assembly. A mapping rate of 99.2% was achieved. Please check line 106 to 108 in the revised manuscript.</p> <p>3. L177: It may not be good to say this. Please rewrite.</p> <p>Answer: As the reviewer suggested, we rewrote part of the sentence. As the detail on parameters was very important for this analysis, we kept this information in the revised manuscript. Please check line 178 in the manuscript.</p> <p>4. FigureS4 and TableS4 are not informative. May change them to a table to list the stats of the raw BioNano maps.</p> <p>Answer: We took the reviewer's suggestion, and FigureS4 was removed. TableS4 was changed to a table which included statistics of the raw BioNano maps.</p> <p>5. TableS5 may add two more columns: one is for the PacBio assembly, and the other one is for the BioNano optical scaffolding. From the improved table, readers can easily tell the changes before and after BioNano scaffolding.</p> <p>Answer: We took the reviewer's suggestion, and this information was added to TableS5. Please check Table S5 in the supplementary file.</p> <p>Finally, we appreciate much your time in editing our manuscript and the reviewers for their valuable suggestions and comments. We look forward to hear your final decision when it is made.</p> |
| <b>Additional Information:</b>                                                |                                                                                                                                                                                                                                                                                                                                                                                                                                                                                                                                                                                                                                                                                                                                                                                                                                                                                                                                                                                                                                                                                                                                                                                                                                                                                                                                                                                                                                                                                                                                                                                                                                                                                                                                                                                                                                                                                                                                                                                                                                                                                                                                                                                                                                                                                                                                                                                                                                                                                                                                                                                                                                                                                                                                                                                                                                                                                                                                                                                                                                                                                                                                                                                                                                                                                                                                                                                                                                                                                                                                                                                                                                                                                                                                                                                                                                                                                                                        |
| <b>Question</b>                                                               | <b>Response</b>                                                                                                                                                                                                                                                                                                                                                                                                                                                                                                                                                                                                                                                                                                                                                                                                                                                                                                                                                                                                                                                                                                                                                                                                                                                                                                                                                                                                                                                                                                                                                                                                                                                                                                                                                                                                                                                                                                                                                                                                                                                                                                                                                                                                                                                                                                                                                                                                                                                                                                                                                                                                                                                                                                                                                                                                                                                                                                                                                                                                                                                                                                                                                                                                                                                                                                                                                                                                                                                                                                                                                                                                                                                                                                                                                                                                                                                                                                        |
| Are you submitting this manuscript to a special series or article collection? | No                                                                                                                                                                                                                                                                                                                                                                                                                                                                                                                                                                                                                                                                                                                                                                                                                                                                                                                                                                                                                                                                                                                                                                                                                                                                                                                                                                                                                                                                                                                                                                                                                                                                                                                                                                                                                                                                                                                                                                                                                                                                                                                                                                                                                                                                                                                                                                                                                                                                                                                                                                                                                                                                                                                                                                                                                                                                                                                                                                                                                                                                                                                                                                                                                                                                                                                                                                                                                                                                                                                                                                                                                                                                                                                                                                                                                                                                                                                     |

|                                                                                                                                                                                                                                                                                                                                                                                                                                                                                                                                                         |            |
|---------------------------------------------------------------------------------------------------------------------------------------------------------------------------------------------------------------------------------------------------------------------------------------------------------------------------------------------------------------------------------------------------------------------------------------------------------------------------------------------------------------------------------------------------------|------------|
| <p><b>Experimental design and statistics</b></p> <p>Full details of the experimental design and statistical methods used should be given in the Methods section, as detailed in our <a href="#">Minimum Standards Reporting Checklist</a>. Information essential to interpreting the data presented should be made available in the figure legends.</p> <p>Have you included all the information requested in your manuscript?</p>                                                                                                                      | <p>Yes</p> |
| <p><b>Resources</b></p> <p>A description of all resources used, including antibodies, cell lines, animals and software tools, with enough information to allow them to be uniquely identified, should be included in the Methods section. Authors are strongly encouraged to cite <a href="#">Research Resource Identifiers</a> (RRIDs) for antibodies, model organisms and tools, where possible.</p> <p>Have you included the information requested as detailed in our <a href="#">Minimum Standards Reporting Checklist</a>?</p>                     | <p>Yes</p> |
| <p><b>Availability of data and materials</b></p> <p>All datasets and code on which the conclusions of the paper rely must be either included in your submission or deposited in <a href="#">publicly available repositories</a> (where available and ethically appropriate), referencing such data using a unique identifier in the references and in the “Availability of Data and Materials” section of your manuscript.</p> <p>Have you have met the above requirement as detailed in our <a href="#">Minimum Standards Reporting Checklist</a>?</p> | <p>Yes</p> |

1           1        ***De novo genome assembly of the red silk cotton tree (*Bombax ceiba*)***

2  
3           2        Yong Gao<sup>1, #</sup>, Haibo Wang<sup>1, #</sup>, Chao Liu<sup>1, #</sup>, Honglong Chu<sup>1</sup>, Dongqin Dai<sup>1</sup>, Shengnan Song<sup>5</sup>, Long Yu<sup>1</sup>,  
4  
5  
6           3        Lihong Han<sup>1</sup>, Yi Fu<sup>2</sup>, Bin Tian<sup>2,3, \*</sup>, Lizhou Tang<sup>1,4, \*</sup>

7  
8  
9           4        <sup>1</sup> Center for Yunnan Plateau Biological Resources Protection and Utilization, College of  
10  
11           5        Biological Resource and Food Engineering, Qujing Normal University, Qujing, Yunnan, 655011, China

12  
13           6        <sup>2</sup> Key Laboratory of Biodiversity Conservation in Southwest China, State Forestry Administration,  
14  
15           7        Southwest Forestry University, Kunming 650224, China

16  
17           8        <sup>3</sup> Key Laboratory of Biodiversity and Biogeography, Kunming Institute of Botany, Chinese Academy  
18  
19           9        of Sciences, Kunming 650204, China

20           10       <sup>4</sup> State Key Laboratory of Genetic Resources and Evolution, Kunming Institute of Zoology, Chinese  
21  
22           11       Academy of Sciences, Kunming 650223, China

23  
24           12       <sup>5</sup> Nextomics Biosciences Institute, Wuhan, Hubei 430000, China

25  
26           13       # These authors contributed equally to this work.

27  
28           14       \* Correspondence should be addressed to Lizhou Tang ([tanglizhou@163.com](mailto:tanglizhou@163.com)) and Bin Tian  
29  
30           15       ([tianbinlzu@163.com](mailto:tianbinlzu@163.com)).

16 *De novo genome assembly of the red silk cotton tree (Bombax ceiba)*

17

18

19 **Abstract**

20 **Background:** *Bombax ceiba* L. (the red silk cotton tree) is a large deciduous tree that is distributed in  
21 tropical and sub-tropical Asia, and northern Australia. It has great economic and ecological importance,  
22 with several applications in industry and traditional medicine in many Asian countries. To facilitate the  
23 further utilization of this plant resource, we present here the draft genome sequence for *B. ceiba*.

24 **Findings:** We assembled a relatively intact genome of *B. ceiba* by using PacBio single-molecule  
25 sequencing and BioNano optical mapping technologies. The final draft genome is approximately 895  
26 Mb long, with contig and scaffold N50 sizes of 1.0 Mb and 2.06 Mb, respectively.

27 **Conclusions:** The high-quality draft genome assembly of *B. ceiba* will be a valuable resource enabling  
28 further genetic improvement and more effective use of this tree species.

29  
30 **Keywords:** *Bombax ceiba*, genome assembly, annotation, evolution.

1 31 **Data description**

2  
3 32 **Introduction**

4  
5  
6 33 *Bombax ceiba* Linn. (Malvaceae), commonly known as the cotton tree or red silk cotton tree, is a  
7  
8  
9 34 spectacular flowering tree with a height of up to 40 meters (Fig. 1a) that is found in tropical and  
10  
11  
12 35 sub-tropical Asia, and northern Australia [1]. It has been chosen as the “city flower” of the cities of  
13  
14  
15 36 Kaohsiung and Guangzhou in China for its large, showy flowers with thick, waxy, red petals that  
16  
17  
18 37 densely clothe leafless branch tips in late winter and early spring (Fig. 1b, c). *B. ceiba* is a source of  
19  
20  
21 38 food, fodder, fiber, fuel, medicine, and many other valuable goods for natives of many Asian countries  
22  
23  
24 39 [2]. For example, its fruits are good sources of silk-cotton for making mattresses, cushions, pillows and  
25  
26  
27 40 quilts [3], while its timbers are widely used in matches, boxes, and splints [4]. Moreover, studies on the  
28  
29  
30 41 cotton tree have shown that it produces many novel secondary metabolites and have explored its  
31  
32  
33 42 traditional medicinal usage by various tribal communities [1, 2, 5, 6]. In addition to its economic and  
34  
35  
36 43 medicinal value, *B. ceiba* is an ecologically important plant: it is a reforestation pioneer that survives  
37  
38  
39 44 easily in low-rainfall and well-drained conditions [7], and has been identified as a plant species suitable  
40  
41  
42 45 for municipal greening because of its capacity to counteract the detrimental effects of air pollution [8,  
43  
44  
45 46 9].

46  
47 Despite the considerable economic and ecological importance of *B. ceiba*, the genomic information  
48  
49  
50 48 available for this species is limited, which has hindered its utilization. Here we report a draft genome  
51  
52  
53 49 sequence for *B. ceiba* that is expected to facilitate and expand its use.

54 50

55  
56 51 **Sampling and sequencing**

57  
58 52 All samples were collected from Yuanmou, Yunnan Province, China (25°40'50.06" N, 101°53'27.76"



1 53 E). Genomic DNA was extracted from leaves of a single tree using the Plant Genomic DNA kit  
2  
3 54 (Tiangen, Beijing, China). A SMRTbell DNA library was then prepared and sequenced using P6, C4  
4  
5  
6 55 chemistry according to the manufacturer's protocols (Pacific Biosciences), and a 20-kb SMRTbell  
7  
8  
9 56 library was generated using a BluePippin DNA size selection instrument (Sage Science) with a lower  
10  
11  
12 57 size limit of 10 kb. Single-molecule real-time sequencing of long reads was conducted on a PacBio  
13  
14  
15 58 Sequel platform with 19 SMRT cells. A total of 86.0 Gb of genomic data with an average read length of  
16  
17  
18 59 8.4kb was generated after quality filtering (Table S1). In addition, a separate paired-end (PE) DNA  
19  
20 60 library with an insert size of 400 bp (amplification by eight PCR cycles) was constructed and  
21  
22  
23 61 sequenced using the Illumina platform (PE 150) to enable a genome survey. The NGS sequencing  
24  
25  
26 62 produced 36.1 Gb of raw data, of which 20.0 Gb retained after filtering.

27  
28 63 Total RNA was extracted from the bud, root, bark, flower, and fruit tissues of one *B. ceiba*  
29  
30  
31 64 individual using the QIAGEN RNeasy Plant Mini Kit (QIAGEN, Hilden, Germany). RNA-seq libraries  
32  
33  
34 65 were then prepared using the TruSeq RNA Library Preparation Kit (Illumina, CA, USA), and  
35  
36  
37 66 paired-end sequencing with a read length of 150 bp was conducted on the HiSeq 2000 platform,  
38  
39  
40 67 yielding 44.41 Gb of clean data (30,816,034–51,191,192 reads per sample) (Table S2).

#### 41 68

#### 42 69 **Genome size and heterozygosity estimation**

#### 43

#### 44

45  
46  
47 70 The genome size of *B. ceiba* was estimated by the K-mer method [10], using sequencing data from the  
48  
49  
50 71 Illumina DNA library. Quality-filtered reads were subjected to 17-mer frequency distribution analysis  
51  
52  
53 72 using the Jellyfish program [10]. The count distribution of 17-mers followed a Poisson distribution,  
54  
55  
56 73 with the highest peak occurring at a depth of 22 (Table S3 and Fig. S1). The estimated genome size was  
57  
58  
59 74 approximately 809,166,127 bp, and the heterozygosity rate of the *B. ceiba* genome was approximately

1 75 0.88%.

2  
3 76

4  
5  
6 77 **Genome assembly**

7  
8  
9 78 Genome assembly was performed on full PacBio long reads using FALCON v0.3.0

10  
11 79 (<https://github.com/PacificBiosciences/falcon>). Error correction and pre-assembly were carried out

12  
13  
14 80 with the FALCON pipeline, after evaluating the outcomes of using different parameters in FALCON

15  
16  
17 81 during the pre-assembly process. Based on the contig N50 results, a length\_cutoff of 11kb and a

18  
19  
20 82 length\_cutoff\_pr of 11.5kb for the assembly step were ultimately chosen. The draft assembly was

21  
22  
23 83 polished using Arrow (<https://github.com/PacificBiosciences/GenomicConsensus>), which mapped the

24  
25  
26 84 PacBio reads to the assembled genome with the Blasr pipeline [11]. The preliminary genome assembly

27  
28 85 was approximately 852Mb in size, with a contig N50 size of 727Kb. A GC depth analysis was

29  
30  
31 86 conducted to assess the potential contamination during sequencing and the coverage of the assembly,

32  
33  
34 87 revealing that the genome had an average GC content of 33.3% and a unimodal GC content distribution

35  
36  
37 88 (Fig. S2). The GC depth **as well as the sequencing depth of** the genome assembly suggested that there

38  
39  
40 89 was no contamination from other species (Fig. S3). **To further assess contaminations, we randomly**

41  
42  
43 90 **selected some sequences from the genome assembly and searched the data against the NCBI database**

44  
45  
46 91 **of bacteria with BLASTN [12] (E-value $\leq$ 1e $-5$ ). No contamination from bacteria was detected.**

47  
48 92

49  
50 93 **Scaffolding with BioNano optical mapping**

51  
52  
53 94 The purified genomic DNA of *B. ceiba* was embedded in an agarose layer and then labeled and

54  
55  
56 95 counterstained using the protocol provided with the IrysPrep Reagent Kit (BioNano Genomics).

57  
58  
59 96 Samples were then loaded into IrysChips and imaged on an Irys imaging instrument (BioNano

1 97 Genomics). After filtering using a molecule length cutoff of < 150Kb, a molecule SNR of < 2.75, a  
2  
3 98 label SNR of < 2.75, and a label intensity of > 0.8, 160.0 Gb of BioNano clean data were obtained,  
4  
5  
6 99 with the N50 size of the labeled single molecules being 269.9 kb (Table S4).  
7

8  
9 100 A molecular quality report was generated by aligning the BioNano library sequences to the initial  
10  
11 101 PacBio genome assembly, yielding a map rate of 34.2%. Using the PacBio genome assembly data as a  
12  
13  
14 102 reference, a reference genome assembly was conducted based on the clean BioNano data, yielding a  
15  
16  
17 103 consensus genome map of 1.09 Gb with an N50 of 0.7 Mb. To obtain a longer scaffold, the *de novo*  
18  
19  
20 104 assembly of PacBio reads was then mapped to the BioNano single-molecule genomic map. After  
21  
22  
23 105 scaffolding, the contig assembly contained 3,105 scaffolds with a scaffold N50 of 1.5Mb.  
24

25 106 To fill the gaps in the scaffolds, the Blasr pipeline [11] was used to map the PacBio long reads to the  
26  
27  
28 107 draft genome assembly scaffolding with BioNano optical mapping. The draft was polished using  
29  
30  
31 108 PBJelly 2 software [13] over three iterations. Reads from the Illumina DNA library (400bp) were then  
32  
33  
34 109 aligned against the genome assembly using the BWA software to fill the gaps and correct potential  
35  
36 110 sequencing errors of the assembly, and a mapping rate of 99.2% was achieved [14]. The final assembly  
37  
38  
39 111 was polished using Pilon [15], yielding a final draft genome of approximately 895 Mb, with contig and  
40  
41  
42 112 scaffold N50 sizes of 1.0 Mb and 2.06 Mb, respectively (Table S5).  
43

44  
45 113

#### 46 47 114 **Evaluation of the completeness of the genome assembly gene space**

48  
49  
50 115 To evaluate the coverage of the assembly, we aligned all the RNA-seq reads against the *B. ceiba*  
51  
52  
53 116 genome assembly using HISAT [16] with default parameters. The percentage of aligned reads ranged  
54  
55  
56 117 from 84.78% to 91.08% (Table S2). We then used Benchmarking Universal Single-Copy Orthologs  
57  
58  
59 118 (BUSCO) [17] to search the annotated genes in the assembly for the 1440 single-copy genes conserved  
60

1 119 among all embryophytes. About 94.4% of the complete BUSCOs were found in the assembly (Table  
2  
3 120 S6). These results suggested that the genome assembly was complete and robust.  
4  
5

6 121

## 7 8 9 122 **Genome annotation**

10  
11 123 The repeat sequences in the genome consisted of simple sequence repeats (SSRs), moderately  
12  
13 124 repetitive sequences, and highly repetitive sequences. The MISA tool [18] was used to search for SSR  
14  
15 125 motifs in the *B. ceiba* genome, with default parameters. A total of 454,435 SSRs were identified in this  
16  
17 126 way: 310,369, 105,004, 30,925, 6,448, 1,165 and 524 mono-, di-, tri-, tetra-, penta-, and  
18  
19 127 hexa-nucleotide repeats, respectively (Table S7).  
20  
21  
22

23  
24  
25 128 To identify known transposable elements (TEs) in the *B. ceiba* genome, RepeatMasker [19] was  
26  
27 129 used to screen the assembled genome against the Repbase (v. 22.11) [20] and Mips-REdat libraries [21].  
28  
29 130 In addition, *de novo* evolved transposable element annotation was performed using RepeatModeler (v.  
30  
31 131 1.0.11) [19]. The combined results of the homology-based and *de novo* predictions indicated that  
32  
33 132 repeated sequences account for 60.3% of the *B. ceiba* genome assembly (Table S8), with TEs  
34  
35 133 comprising 60.30% of the repeated sequences, and long terminal repeats (LTRs) accounting for the  
36  
37 134 greatest proportion (47.86%) of TEs (Table S8).  
38  
39  
40  
41  
42

43  
44 135 Homology-based ncRNA annotation was performed by mapping plant rRNA, miRNA and snRNA  
45  
46 136 genes from the Rfam database (release 13.0) [22] to the *B. ceiba* genome using BLASTN [12] (E-value  
47  
48 137  $\leq 1e-5$ ). The tRNAscan-SE (v1.3.1) [23] program was used (with default parameters for eukaryotes) for  
49  
50 138 tRNA annotation. RNAmmer v1.2 [24] was used to predict rRNAs and their subunits. These analyses  
51  
52 139 identified 496 miRNAs, 894 tRNAs, 6,772 rRNAs, and 727 snRNAs (Table S9).  
53  
54  
55  
56

57  
58 140 The homology-based and *de novo* predictions were also used to annotate protein coding genes. For  
59  
60  
61  
62  
63  
64  
65

1 141 homology-based predictions, protein sequences from four species (*Arabidopsis thaliana*, *Carica*  
2  
3 142 *papaya*, *Gossypium arboreum* and *Theobroma cacao*) (Table S10) were mapped onto the *B. ceiba*  
4  
5  
6 143 genome; the aligned sequences and the corresponding query proteins were then filtered and passed to  
7  
8  
9 144 GeneWise v2.4.1 [25] to search for accurately spliced alignments. For the *de novo* predictions, we first  
10  
11  
12 145 randomly selected 1000 full-length genes from the homology-based predictions to train model  
13  
14  
15 146 parameters for Augustus v3.0 [26], GeneID v1.4.4 [27], GlimmerHMM [28] and SNAP [29]. Augustus  
16  
17 147 v3.0 [26], GeneID v1.4.4 [27], GlimmerHMM [28] and SNAP [29] were then used to predict genes  
18  
19  
20 148 based on the training set. Finally, EVidenceModeler (EVM) v1.1.1 [30] was used to integrate the  
21  
22  
23 149 predicted genes and generate a consensus gene set (Table S10). Genes with transposable elements were  
24  
25  
26 150 discarded using the TransposonPSI (<http://transposonpsi.sourceforge.net/>) package. Low-quality genes  
27  
28 151 consisting of fewer than 50 amino acids and/or exhibiting premature termination were also removed  
29  
30  
31 152 from the gene set, yielding a final set of 52,705 genes. The final set's average transcript length, average  
32  
33  
34 153 CDS length and exon number per gene were 2,418.37 bp, 1,019.38 bp and 4.57, respectively (Table  
35  
36 154 S11, Fig. S4).

37  
38  
39 155 The annotations of the predicted genes of *B. ceiba* were screened for homology against the Uniprot  
40  
41  
42 156 (release 2017\_10) and KEGG (release 84.0) databases using Blastall [12] and KAAS [31]. Then, the  
43  
44  
45 157 InterProScan [32] package was used to annotate the predicted genes using the InterPro (5.21-60.0)  
46  
47  
48 158 database. In total, 47,105 of the total 52,705 genes (89.37%) were annotated with potential functions  
49  
50  
51 159 (Table S12).

52  
53 160

### 54 55 56 161 **Phylogenetic tree construction and divergence time estimation**

57  
58 162 To investigate the evolutionary position of *B. ceiba*, we compared its genome to the genome sequences  
59  
60  
61  
62  
63  
64  
65

1 163 of 12 other plants. These included four plants in the Malvales order (*Gossypium arboreum*, *Durio*  
2  
3 164 *zibethinus*, *Corchorus olitorius* and *Theobroma cacao*), seven plants from different orders in the same  
4  
5  
6 165 Eudicots clade (*Arabidopsis thaliana*, *Carica papaya*, *Linum usitatissimum*, *Populus trichocarpa*,  
7  
8  
9 166 *Camellia sinensis*, *Solanum lycopersicum* and *Vitis vinifera*), and *Oryza sativa* as an outgroup. Genome  
10  
11  
12 167 sequences from *A. thaliana*, *T. cacao*, *C. papaya*, *L. usitatissimum*, *P. trichocarpa*, *C. sinensis*, *S.*  
13  
14 168 *lycopersicum*, *V. vinifera* and *O. sativa* were downloaded from Phytozome v. 12.0 [33]. Gene sequences  
15  
16  
17 169 of *G. arboreum*, *C. olitorius* and *D. zibethinus* were downloaded from the NCBI Database  
18  
19  
20 170 (PRJNA335838, PRJNA215141 and PRJNA400310). We used the OrthoMCL (v2.0.9) pipeline [34]  
21  
22 171 (BLASTP E-value $\leq 1e-5$ ) to identify potentially orthologous gene families within these genomes. Gene  
23  
24  
25 172 family clustering identified 16,586 gene families containing 37,736 genes in *B. ceiba* (Fig. 2a). Of  
26  
27  
28 173 these, 906 gene families were unique to *B. ceiba* (Table S13). *B. ceiba* and other Malvales plants had  
29  
30  
31 174 the largest number of shared gene families among the studied plants.

32  
33  
34 175 Phylogenetic analysis was performed using 172 single copy orthologous genes from common gene  
35  
36 176 families found by OrthoMCL [34] (Fig. S5). We codon-aligned each gene family using MUSCLE [35],  
37  
38  
39 177 and curated the alignments with Gblocks v0.91b [36]. Phylogeny analysis was performed using  
40  
41  
42 178 RAxML v 8.2.11[37] with the GTRGAMMA model and 100 bootstrap replicates. We then used  
43  
44  
45 179 MCMCTREE as implemented in PAML v4.9e [38] to estimate the divergence times of *B. ceiba* from  
46  
47  
48 180 the other plants. **The parameter settings of MCMCTREE were as follows**, clock=2, RootAge $\leq 1.73$ ,  
49  
50  
51 181 model=7, BDparas =110, kappa\_gamma = 62, alpha\_gamma = 11, rgene\_gamma = 23.18, and  
52  
53 182 sigma2\_gamma = 14.5. In addition, the divergence times of *O. sativa* (148-173 Mya), *V. vinifera*  
54  
55  
56 183 (110-124Mya) and *A. thaliana* (53-82 Mya) were used for fossil calibration. The phylogenetic analysis  
57  
58  
59 184 showed that *B. ceiba* is more closely related to *G. arboreaum* than to *D. zibethinus* (Fig. S6), which

1 185 supports the well-established hypothesis of a close relationship between Bombacaceae and Malvaceae  
2  
3 186 [39, 40]. Recent phylogenetic studies have suggested that the group traditionally referred to as  
4  
5  
6 187 Bombacaceae (which includes the tribe Durioneae) is not actually monophyletic, and that the genera of  
7  
8  
9 188 the tribe Durioneae should be excluded from Bombacaceae. Most members of the erstwhile family  
10  
11  
12 189 Bombacaceae have been transferred to the subfamily Bombacoideae within the family Malvaceae [40].  
13  
14  
15 190 This phylogenetic ordering was supported by our phylogenetic analysis of the complete chloroplast  
16  
17  
18 191 genomes of Marvel plants [41]. The estimated divergence time of *B. ceiba* and *D. zibethinus* was 29.5  
19  
20 192 million years ago, while that of *B. ceiba* and *G. arboretum* was about 20.6 million years ago (Fig. 2b).

21  
22  
23 193

#### 24 25 194 **Genes under positive selection**

26  
27  
28 195 *B. ceiba* is an ecologically important plant which could survive in extreme climate conditions, such as  
29  
30  
31 196 hot-dry valley [7]. According to the neutral evolution theory of Darwin [42], the ratio of  
32  
33  
34 197 nonsynonymous substitution rate (Ka) and synonymous substitution rate (Ks) of protein coding genes  
35  
36  
37 198 could be used to identify genes under natural selection. So we calculated the average Ka/Ks values and  
38  
39  
40 199 conducted the branch-site likelihood ratio test using CodeMl implemented in PAML package [38] to  
41  
42  
43 200 identify positively selected genes in the *B. ceiba* lineage. These genes might contribute to the adaption  
44  
45  
46 201 of unfavorable environments. Thirty-six positively selected genes were identified ( $P \leq 0.05$ ). Of which,  
47  
48  
49 202 32 genes could be annotated with potential functions in the Swissport database (Table S14). One gene  
50  
51  
52 203 was homolog to desiccation protectant protein coding gene (*Lea14*). There was a strong association of  
53  
54  
55 204 LEA proteins with abiotic stress tolerance particularly dehydration and cold stress [43]. This gene  
56  
57  
58 205 could potentially contribute to the adaption of *B. ceiba* to the dry valley environment. Another gene  
59  
60  
61 206 was homolog to the gene coding Kelch domain-containing protein 4. The Kelch domain-containing

1 207 proteins were involved in regulating a number of major processes such as growth, development, and  
2  
3 208 biotic and abiotic stress responses in plants [44, 45]. The E3 ubiquitin-protein ligase (RFWD3) was  
4  
5  
6 209 suggested by some researchers that it had potential roles in plant stress responses [46, 47]. Twenty-one  
7  
8  
9 210 positively selected sites were identified in the CACTIN protein coding gene. The CACTIN protein was  
10  
11  
12 211 characterized as a negative regulator of many different developmental processes, such as  
13  
14  
15 212 embryogenesis [48]. While there were rare literature reports, other identified genes might also be  
16  
17  
18 213 associated with the ecological adaption of *B. ceiba*. It should be noted that this was just a primarily  
19  
20 214 analysis of functions of these genes, further studies would be needed to clarify the roles of these genes.  
21  
22

23 215

#### 25 216 **Whole-genome duplication and Gene family expansion analysis**

27  
28 217 We used four-fold synonymous third-codon transversion (4DTv) estimation to detect whole-genome  
29  
30  
31 218 duplication (WGD) events in the *B. ceiba* genome. To this end, paralogous sequences of *B. ceiba*, *T.*  
32  
33  
34 219 *cacao*, *V. vinifera*, *S. lycopersicum* and *D. zibethinus* was identified with OrthoMCL [34]. Then, protein  
35  
36  
37 220 sequences for each of these plants were aligned against one-other with Blastp [12] (using an E-value  
38  
39  
40 221 threshold of  $\leq 1e-5$ ) to identify conserved paralogs in each species. Finally, potential WGD events in  
41  
42  
43 222 each genome were evaluated based on their 4DTv distribution. The WGD analysis suggested that *B.*  
44  
45 223 *ceiba* experienced the same same WGD events as other Dicotyledons, and that *B. ceiba* and *D.*  
46  
47  
48 224 *zibethinus* went through their WGD events before diverging from their common ancestor (Fig. 2c).  
49

50 225 The OrthoMCL gene family analysis results were analyzed further by using CAFE (Computational  
51  
52  
53 226 Analysis of gene Family Evolution, v3.0) [49] to detect expanded gene families. This approach  
54  
55  
56 227 revealed 5,612 expanded gene families and 1,902 contracted gene families in the *B. ceiba* lineage (Fig.  
57  
58  
59 228 S7).



1  
2  
3  
4  
5  
6  
7  
8  
9  
10  
11  
12  
13  
14  
15  
16  
17  
18  
19  
20  
21  
22  
23  
24  
25  
26  
27  
28  
29  
30  
31  
32  
33  
34  
35  
36  
37  
38  
39  
40  
41  
42  
43  
44  
45  
46  
47  
48  
49  
50  
51  
52  
53  
54  
55  
56  
57  
58  
59  
60  
61  
62  
63  
64  
65

229  
230  
231  
232  
233  
234  
235  
236  
237  
238  
239  
240  
241  
242  
243  
244  
245  
246  
247  
248  
249  
250

**Conclusion**

This paper reports the sequencing, assembly, and annotation of the *B. ceiba* genome along with details of its evolutionary history. The genomic data generated in this work will be a valuable resource for further genetic improvement and effective use of the red silk cotton tree.

**Availability of supporting data**

The raw data from our genome project was deposited in the SRA (Sequence Read Archive) database of national center for biotechnology information with Bioproject ID PRJNA429932. **The assembly and annotation of the *B. ceiba* genome are available in the GigaScience GigaDB database. Versions and main parameters of the software used in this study are provided in Table S15 in the supplementary file.**

**Competing interests**

S. S. is an employee of Nextomics Biosciences. Other authors declare that they have no competing interests.

**Authors' contributions**

L. T. and B. T. designed the project; H. W., C. L. and H. C. collected samples and extracted the DNA and RNA samples; Y. G., S. S., H. W. and C. L. worked on sequencing and data analyzing; Y. G. wrote the manuscript; L. T., B. T. and D. D. revised the manuscript; All authors read and approved the final version of the manuscript.

**Acknowledgements**

We thank Guanglong Ou, Jianmei Wu and Renbin Zhu for offering photos of *B. ceiba*. This study was **financially** supported by the National Science Foundation of China (grant 31460561, 31760103,

251 31460179 and 31660680), the Key Laboratory of Forest Resources Conservation and Utilization in the  
252 Southwest Mountains of China (Southwest Forestry University), Ministry of Education, and the  
253 Yunnan Applied Basic Research Project (grant 2017FD145).

## 254 References

- 255 1. Barwick M. Tropical and Subtropical Trees. Portland, OR: Timber Press; 2004.
- 256 2. Jain V , Verma SK. Pharmacology of *Bombax Ceiba* Linn. Berlin Heidelberg: Springer; 2012.
- 257 3. Chand S , Singh AK. In Vitro Propagation of *Bombax Ceiba* L. (Silkcotton). *Silvae Genetica*.  
258 1999;48 (6):313-7.
- 259 4. Nair GS , Bai Y. Ethnobotanical Value of Dry, Fallen Ovaries of *Bombax Ceiba* L. (Bombacaceae:  
260 Malvales). *Journal of Threatened Taxa*. 2012;4 (15):3443-6.
- 261 5. Ngwuluka NC. Are *Bombax Buonopozense* and *Bombax Malabaricum* Possible Nutraceuticals  
262 for Age Management? *Preventive Medicine*. 2012;54 (S3):64-70.
- 263 6. Pankaj HC , Somshekhar SK. *Bombax Ceiba* Linn.: Pharmacognosy, Ethnobotany and  
264 Phyto-Pharmacology. *Pharmacognosy Communications*. 2012;2 (3):2-9.
- 265 7. Zhou Z, Ma H, Lin K, et al. RNA-Seq Reveals Complicated Transcriptomic Responses to  
266 Drought Stress in a Nonmodel Tropic Plant, *Bombax Ceiba* L. *Evolutionary Bioinformatics*.  
267 2015;11 (S1):27-37.
- 268 8. Peng C, Wen D, Sun Z, et al. Response of Some Plants for Municipal Greening to Air Pollutants.  
269 *Journal of Tropical and Subtropical Botany*. 2002;10 (4):321-7.
- 270 9. Elhagrassi AM, Ali MM, Osman AF, et al. Phytochemical Investigation and Biological Studies of  
271 *Bombax Malabaricum* Flowers. *Natural Product Research*. 2011;25 (2):141-51.
- 272 10. Marçais G , Kingsford C. A Fast, Lock-Free Approach for Efficient Parallel Counting of  
273 Occurrences of K-Mers. *Bioinformatics*. 2011;27 (6):764-70.
- 274 11. Chaisson MJ , Tesler G. Mapping Single Molecule Sequencing Reads Using Basic Local  
275 Alignment with Successive Refinement (Blasr): Application and Theory. *BMC Bioinformatics*.  
276 2012;13 (1):238.
- 277 12. Camacho C, Coulouris G, Avagyan V, et al. Blast+: Architecture and Applications. *BMC*  
278 *Bioinformatics*. 2009;10 (1):421.
- 279 13. Worley KC, English AC, Richards S, et al. Improving Genomes Using Long Reads and Pbjelly 2.  
280 In: *International Plant and Animal Genome Conference Xxii 2014*.
- 281 14. Li H , Durbin R. Fast and Accurate Short Read Alignment with Burrows–Wheeler Transform.  
282 Oxford University Press; 2009.
- 283 15. Walker BJ, Abeel T, Shea T, et al. Pilon: An Integrated Tool for Comprehensive Microbial  
284 Variant Detection and Genome Assembly Improvement. *Plos One*. 2014;9 (11):e112963.
- 285 16. Kim D, Langmead B , Salzberg SL. Hisat: A Fast Spliced Aligner with Low Memory  
286 Requirements. *Nature Methods*. 2015;12 (4):357-60.
- 287 17. Simão FA, Waterhouse RM, Ioannidis P, et al. Busco: Assessing Genome Assembly and  
288 Annotation Completeness with Single-Copy Orthologs. *Bioinformatics*. 2015;31 (19):3210-2.
- 289 18. Thiel T, Michalek W, Varshney RK, et al. Exploiting Est Databases for the Development and  
290 Characterization of Gene-Derived Ssr-Markers in Barley (*Hordeum Vulgare* L.). *Theoretical*

291 and Applied Genetics. 2003;106 (3):411-22.

1 292 19. Tarailograovac M , Chen N. Using Repeatmasker to Identify Repetitive Elements in Genomic  
2 293 Sequences. 2009;3:4-14.

3 294 20. Bao W, Kojima KK , Kohany O. Repbase Update, a Database of Repetitive Elements in  
4 295 Eukaryotic Genomes. Mobile DNA. 2015;6 (1):11.

5 296 21. Thomas N, Martis MM, Roessner SK, et al. Mips Plantsdb: A Database Framework for  
6 297 Comparative Plant Genome Research. Nucleic Acids Research. 2013;41:1144-51.

7 298 22. Kalvari I, Argasinska J, Quinones-Olvera N, et al. Rfam 13.0: Shifting to a Genome-Centric  
8 299 Resource for Non-Coding RNA Families. Nucleic Acids Research. 2017;  
9 300 doi:https://doi.org/10.1093/nar/gkx1038.

10 301 23. Lowe TM , Eddy SR. Trnscan-Se: A Program for Improved Detection of Transfer RNA Genes in  
11 302 Genomic Sequence. Nucleic Acids Research. 1997;25 (5):955-64.

12 303 24. Lagesen K, Hallin P, Rødland EA, et al. RNAmmer: Consistent and Rapid Annotation of  
13 304 Ribosomal Rna Genes. Nucleic Acids Research. 2007;35 (9):3100-8.

14 305 25. Birney E , Durbin R. Using Genewise in the Drosophila Annotation Experiment. Genome  
15 306 Research. 2000;10 (4):547-8.

16 307 26. Stanke M, Steinkamp R, Waack S, et al. Augustus: A Web Server for Gene Finding in  
17 308 Eukaryotes. Nucleic Acids Research. 2004;32:309-12.

18 309 27. Blanco E, Parra G , Guigó R. Using Geneid to Identify Genes. Current protocols in  
19 310 bioinformatics. 2007; 4 (3):1-28.

20 311 28. Majoros WH, Pertea M , Salzberg SL. Tigrscan and Glimmerhmm: Two Open Source Ab Initio  
21 312 Eukaryotic Gene-Finders. Bioinformatics. 2004;20 (16):2878-9.

22 313 29. Bromberg Y , Rost B. Snap: Predict Effect of Non-Synonymous Polymorphisms on Function.  
23 314 Nucleic Acids Research. 2007;35 (11):3823-35.

24 315 30. Haas BJ, Salzberg SL, Wei Z, et al. Automated Eukaryotic Gene Structure Annotation Using  
25 316 Evidencemodeler and the Program to Assemble Spliced Alignments. Genome Biology. 2008;9  
26 317 (1):R7.

27 318 31. Moriya Y, Itoh M, Okuda S, et al. Kaas: An Automatic Genome Annotation and Pathway  
28 319 Reconstruction Server. Nucleic Acids Research. 2007;35:W182-W5.

29 320 32. Quevillon E, Silventoinen V, Pillai S, et al. Interproscan: Protein Domains Identifier. Nucleic  
30 321 Acids Research. 2005;33:116-20.

31 322 33. M GD, Shengqiang S, Russell H, et al. Phytozome: A Comparative Platform for Green Plant  
32 323 Genomics. Nucleic acids research. 2012;40 (Database issue):D1178-D86.

33 324 34. Li L, Stoeckert CJ , Roos DS. Orthomcl: Identification of Ortholog Groups for Eukaryotic  
34 325 Genomes. Genome Research. 2003;13 (9):2178-89.

35 326 35. Edgar RC. Muscle: Multiple Sequence Alignment with High Accuracy and High Throughput.  
36 327 Nucleic Acids Research. 2004;32 (5):1792-7.

37 328 36. Talavera G , Castresana J. Improvement of Phylogenies after Removing Divergent and  
38 329 Ambiguously Aligned Blocks from Protein Sequence Alignments. Systematic Biology. 2007;56  
39 330 (4):564-77.

40 331 37. Stamatakis A. Raxml Version 8: A Tool for Phylogenetic Analysis and Post-Analysis of Large  
41 332 Phylogenies. Bioinformatics. 2014;30 (9):1312-3.

42 333 38. Yang Z. Paml 4: Phylogenetic Analysis by Maximum Likelihood. Molecular Biology and  
43 334 Evolution. 2007;24 (8):1586-91.

- 1  
2  
3  
4  
5  
6  
7  
8  
9  
10  
11  
12  
13  
14  
15  
16  
17  
18  
19  
20  
21  
22  
23  
24  
25  
26  
27  
28  
29  
30  
31  
32  
33  
34  
35  
36  
37  
38  
39  
40  
41  
42  
43  
44
- 335 39. Baum DA, Smith DW, Yen A, et al. Phylogenetic Relationships of Malvateca (Bombacoideae  
336 and Malvoideae; Malvaceae Sensu Lato) as Inferred from Plastid DNA Sequences. American  
337 Journal of Botany. 2004;91 (11):1863-71.
- 338 40. Heywood, V.H, Brummitt, et al. Flowering Plant Families of the World. Richmond, Surrey:  
339 Royal Botanic Gardens; 2007.
- 340 41. Gao Y, Wang H, Liu C, et al. Complete Chloroplast Genome Sequence of the Red Silk Cotton  
341 Tree (*Bombax Ceiba*). Mitochondrial DNA Part B. 2018;3 (1):315-6.  
342 doi:10.1080/23802359.2017.1422399.
- 343 42. Darwin C. On the Origin of Species by Means of Natural Selection or, The preservation of  
344 Favoured Races in the Struggle for Life. American Anthropologist. 1951;61 (1):176-7.
- 345 43. Shinde S, Nurul IM, Ng CK. Dehydration Stress-Induced Oscillations in LEA Protein Transcripts  
346 Involves Abscisic Acid in the Moss, *Physcomitrella Patens*. New Phytologist. 2012;195  
347 (2):321-8.
- 348 44. Feder A, Burger J, Gao S, et al. Focus on Metabolism: A Kelch Domain-Containing F-Box  
349 Coding Gene Negatively Regulates Flavonoid Accumulation in Muskmelon. Plant Physiology.  
350 2015;169 (3):1714-26.
- 351 45. Zhang X, Gou M, Guo C, et al. Down-Regulation of Kelch Domain-Containing F-Box Protein in  
352 Arabidopsis Enhances the Production of (Poly)Phenols and Tolerance to Ultraviolet Radiation.  
353 Plant Physiology. 2015;167 (2):337-50.
- 354 46. Serrano I, Campos L, Rivas S. Roles of E3 Ubiquitin-Ligases in Nuclear Protein Homeostasis  
355 During Plant Stress Responses. Frontiers in Plant Science. 2018;9 (139)  
356 doi:10.3389/fpls.2018.00139.
- 357 47. Duplan V, Rivas S. E3 Ubiquitin-Ligases and Their Target Proteins During the Regulation of  
358 Plant Innate Immunity. Frontiers in Plant Science. 2014;5 (42) doi:10.3389/fpls.2014.00042.
- 359 48. Baldwin KL, Dinh EM, Hart BM, et al. CACTIN is an Essential Nuclear Protein in *Arabidopsis*  
360 and may be Associated with the Eukaryotic Spliceosome. Febs Letters. 2013;587 (7):873-9.
- 361 49. De Bie T, Cristianini N, Demuth JP, et al. Cafe: A Computational Tool for the Study of Gene  
362 Family Evolution. Bioinformatics. 2006;22 (10):1269-71.

363  
364  
365  
366  
367  
368  
369  
370

**Figure 1. Example of the red silk cotton tree (*B. ceiba*).** (a) Natural habitat of *B. ceiba* (image from Guanglong Ou). (b) *B. ceiba* used as municipal greening trees (image from Jianmei Wu). (c) The flower of *B. ceiba* (image from Renbin Zhu).

**Figure 2. Phylogenetic relationships and genomic comparisons between *B. ceiba* and other plants.**

(a) A Venn diagram of shared gene families between *B. ceiba* and three other Malvales plants, with *A. thaliana* as an outgroup. Each number represents a gene family number. (b) Inferred phylogenetic tree

1 371 across 13 plant species. The estimated divergence time (Mya) is shown at each node. (c) WGD events  
2  
3 372 of four plants (*B. ceiba*, *D. zibethinus*, *S. lycopersicum* and *V. vinifera*) inferred by 4DTV estimations.  
4  
5  
6 373 Peaks corresponding to speciation, recent and ancient WGDs are indicated by arrows.  
7  
8

9 374

10  
11 375 **Additional files**

12  
13  
14 376 **Figure S1.** Frequency distribution of the 17-mer graph analysis used to estimate the size of the *B. ceiba*  
15  
16  
17 377 genome.

18  
19  
20 378 **Figure S2.** GC content distribution of the *B. ceiba* genome. The GC content was established using 500  
21  
22  
23 379 bp sliding windows.

24  
25 380 **Figure S3.** The GC depth distribution of the *B. ceiba* genome.

26  
27  
28 381 **Figure S4.** Comparison of gene structure characteristics in *B. ceiba* to that in other plants. a, CDS  
29  
30  
31 382 length; b, Exon length; c, Exon number; d, Gene length; e, Intron length.

32  
33  
34 383 **Figure S5.** Gene orthology determined by comparing genomes using the OrthoMCL software.

35  
36 384 **Figure S6.** The maximum-likelihood phylogeny of *B. ceiba* and 13 other plants.

37  
38  
39 385 **Figure S7.** Gene family expansions and contractions in *B. ceiba* and 13 other plants.

40  
41  
42 386 **Table S1.** Sequencing statistics from the PacBio platform

43  
44  
45 387 **Table S2.** Summary of the transcriptomes and their mapping rates on the genome assembly

46  
47  
48 388 **Table S3.** Estimation of genome size based on 17-mer statistics

49  
50  
51 389 **Table S4.** Summary of the BioNano optical mapping data

52  
53 390 **Table S5.** Summary of the final genome assembly

54  
55  
56 391 **Table S6.** Summary of BUSCO analysis results

57  
58  
59 392 **Table S7.** Summary of the SSR search results  
60  
61  
62  
63  
64  
65

1 393 **Table S8.** Repeat annotation of the *Bombax ceiba* genome assembly  
2  
3 394 **Table S9.** Summary of non-protein-coding gene annotations in the *Bombax ceiba* genome assembly  
4  
5  
6 395 **Table S10.** Gene annotation statistics of the *Bombax ceiba* genome assembly  
7  
8  
9 396 **Table S11.** Comparative gene statistics  
10  
11 397 **Table S12.** Functional annotation of predicted genes of *Bombax ceiba*  
12  
13  
14 398 **Table S13.** Summary statistics of gene families in 13 plant species  
15  
16  
17 399 **Table S14.** Candidate positively selected genes in the *Bombax ceiba* lineage  
18  
19  
20 400 **Table S15.** Versions and main parameters of the software used in this study  
21  
22  
23  
24  
25  
26  
27  
28  
29  
30  
31  
32  
33  
34  
35  
36  
37  
38  
39  
40  
41  
42  
43  
44  
45  
46  
47  
48  
49  
50  
51  
52  
53  
54  
55  
56  
57  
58  
59  
60  
61  
62  
63  
64  
65

(a)

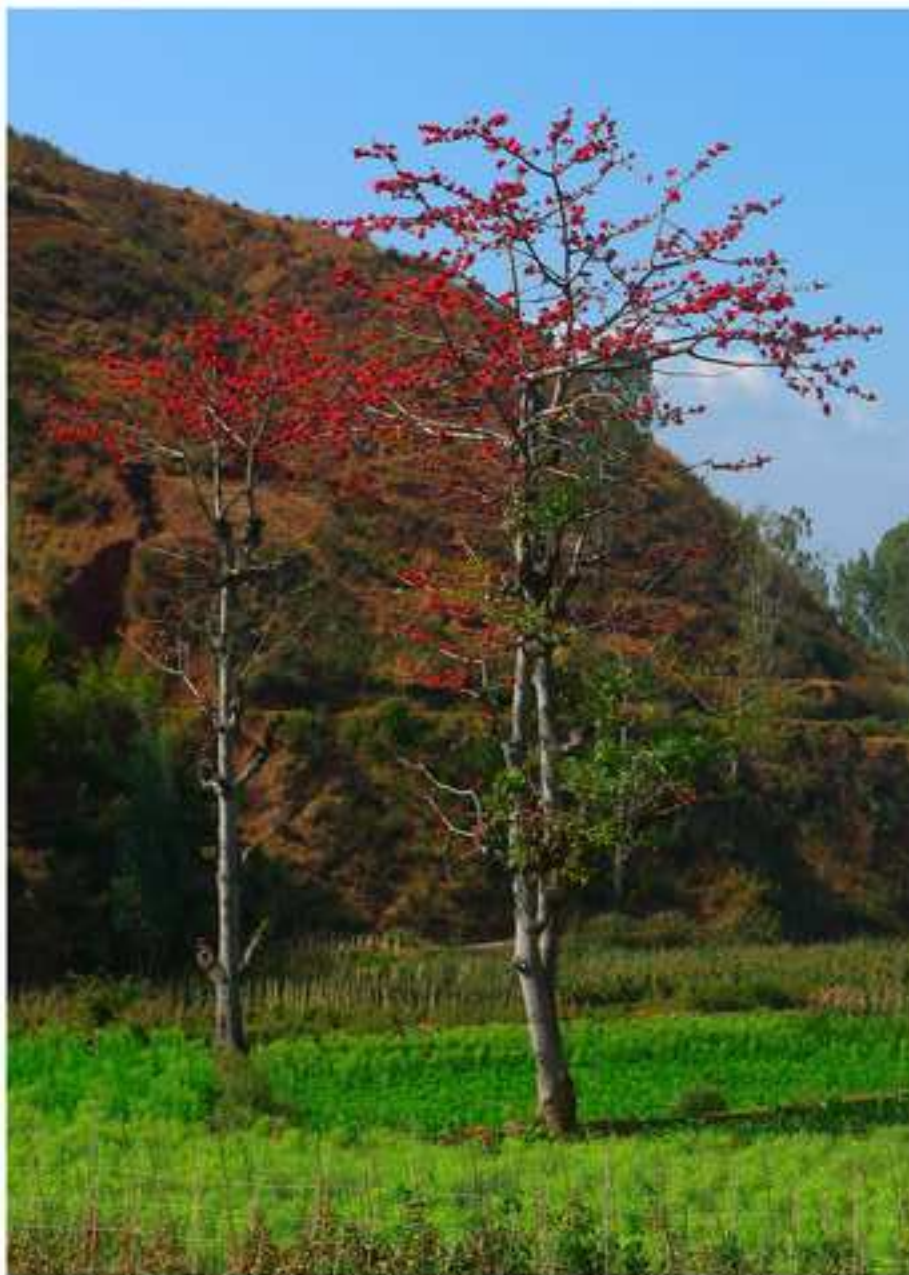

(b)

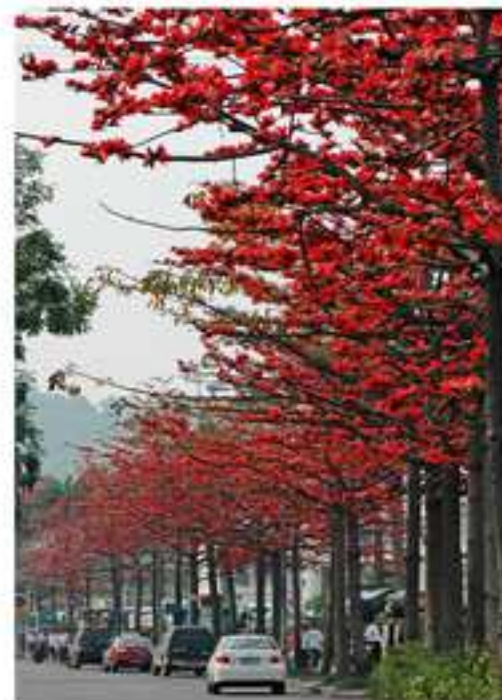

(c)

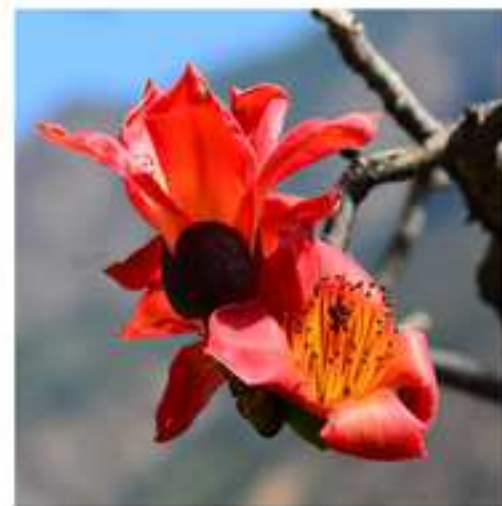

Figure 2

(a)

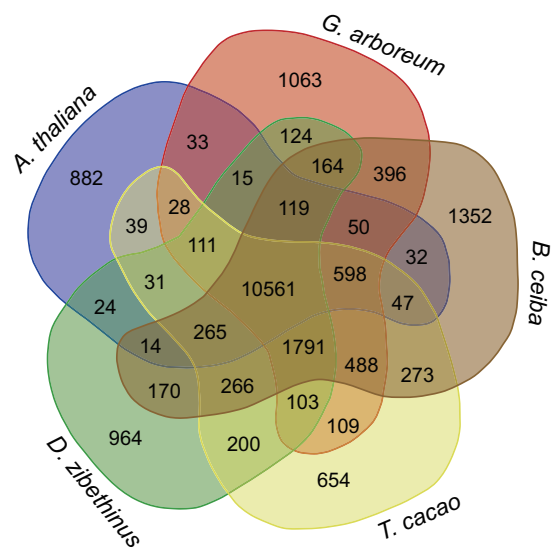

(b)

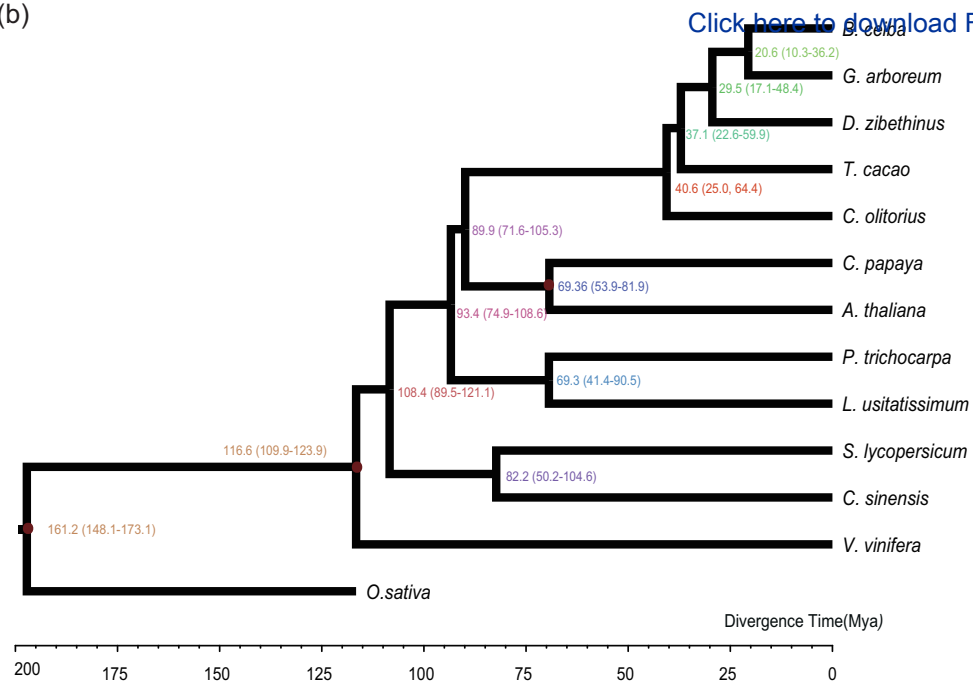

(c)

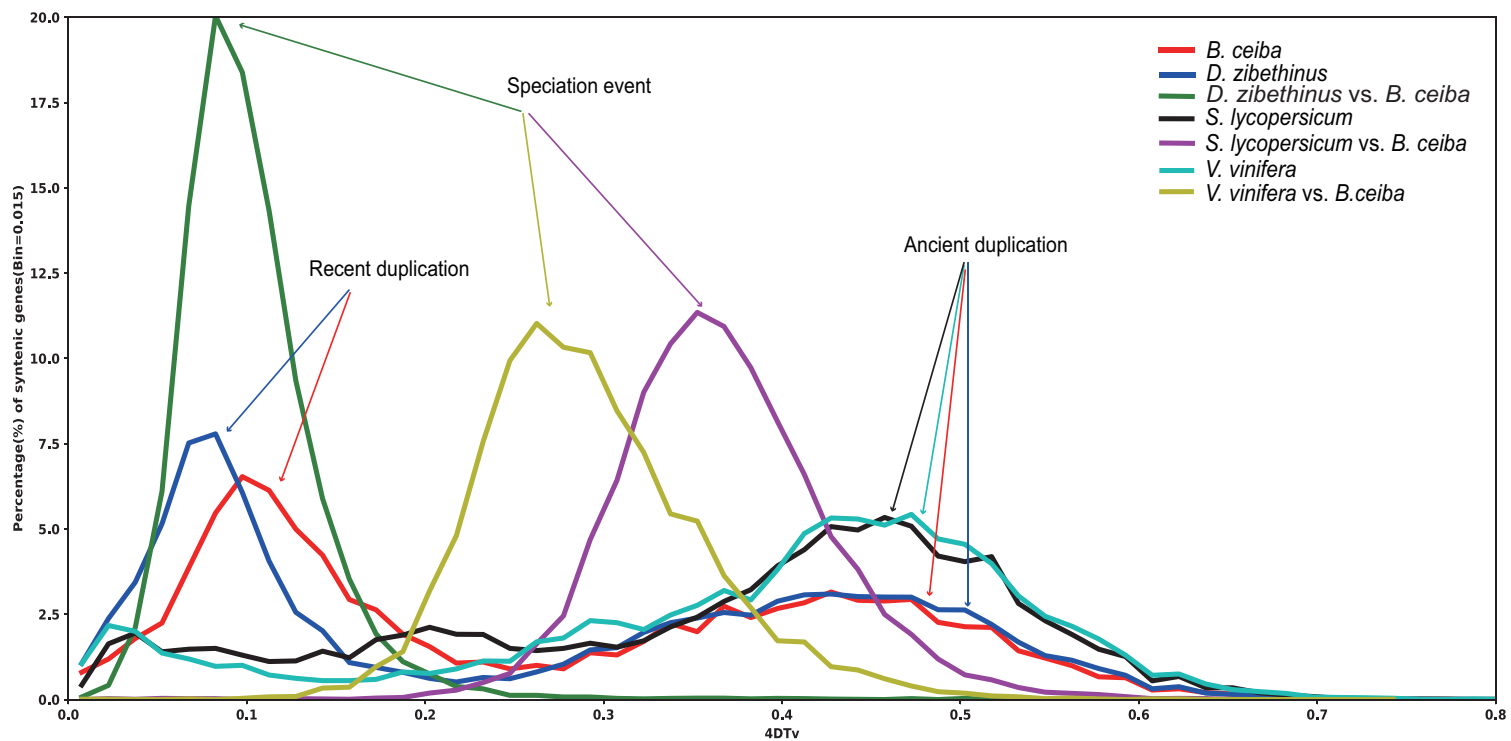



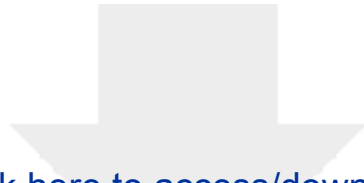

Click here to access/download  
**Supplementary Material**  
Supplementary file20180309.docx

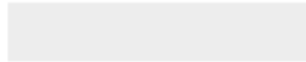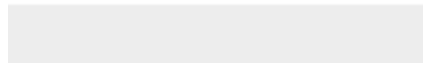

Supplement: giy051_giga-d-18-00045_revision_1.pdf [file giy051_giga-d-18-00045_revision_1.pdf]
